# Supplementary material for: Secondhand smoke (SHS) exposure before and after the implementation of the Tobacco Free Cities (TFC) initiative in five Chinese cities: a pooled cross-sectional study
Source: PubMed Central journal article supplement — BMJ Open. 2020 Dec 29;10(12):e044570. doi: 10.1136/bmjopen-2020-044570 (PMC7778775; doi:10.1136/bmjopen-2020-044570), 2020-12-29
Supplement: bmjopen-2020-044570supp001.pdf [file bmjopen-2020-044570supp001.pdf]

Supplemental Table 1. Description of the five Chinese cities participated in the Tobacco Free Cities (TFC) initiative and city-specific activities implemented from 2015 to 2018

| City, (Population, GDP)                       | Smoke-Free Policy Goal (n or adoption date)                                                                                            | Policy Inspection Frequency | # of Media Mentions | Health Education/Mass Media Campaigns                                                                                                                                                       | Cessation Interventions                                           |
|-----------------------------------------------|----------------------------------------------------------------------------------------------------------------------------------------|-----------------------------|---------------------|---------------------------------------------------------------------------------------------------------------------------------------------------------------------------------------------|-------------------------------------------------------------------|
| Chengdu (16 million, 1.39 trillion yuan)      | SF government worksites (n=21)<br>SF business worksites (n=15)                                                                         | Every 2 months              | 110                 | WNTD and CNY mass media campaigns; PSAs on subways; city educational events                                                                                                                 | Cessation training for healthcare workers                         |
| Chongqing (30.75 million, 1.95 trillion yuan) | SF government worksites (n=1500)<br>SF business worksites (n=2)                                                                        | Twice per year              | 132                 | WNTD and CNY mass media campaigns; PSAs on TV and outdoor media outlets<br>WNTD and CNY mass media campaigns; PSAs on subways; city educational websites; knowledge competitions via WeChat | Cessation counseling at two large businesses                      |
| Wuhan (10.89 million, 1.34 trillion yuan)     | SF government worksites (n=106)<br>SF business worksites (190)<br>SF campus (n=38)                                                     | Monthly                     | 102                 | WNTD and CNY mass media campaigns; PSAs on subways; city educational websites; knowledge competitions via WeChat                                                                            | Citywide cessation completion; cessation hotline                  |
| Xi'an (9.06 million, 746.69 billion)          | SF public places (August 2018); effective November 2018 *<br>SF business (n=65)<br>SF homes (n=2200)<br>SF government worksites (n=33) | Quarterly                   | 263                 | WNTD and CNY mass media campaigns; PSAs on subways; citywide "no butts fall to the ground, Xian is beautiful" campaign                                                                      | Free cessation clinics; citywide cessation competition            |
| Xiamen (4.1 million, 435 billion yuan)        | SF business worksites (n=86)<br>SF scenery districts, including a UNESCO site(n=3)                                                     | Twice per year              | 116                 | WNTD and CNY mass media campaigns; SF business awards ceremonies                                                                                                                            | Cessation services provided to SF government and business workers |

Abbreviations: World No Tobacco Day (WNTD); Chinese New Year (CNY); Public Service Announcements (PSA)

\* Xi'an implemented their city-wide smoke-free law after the Wave 2 survey was conducted

Supplemental Table 2. Sample size, response rate, and survey date for each of the five Chinese cities participated in the Tobacco Free Cities (TFC) initiative, 2015 and 2018

| Locations            | Number of Interviews |       |        | Response Rate <sup>1</sup> | Survey Date           |
|----------------------|----------------------|-------|--------|----------------------------|-----------------------|
|                      | Overall              | Male  | Female |                            |                       |
| Year 2015 (N=10,184) |                      |       |        |                            |                       |
| Chengdu              | 1,946                | 903   | 1,043  | 89.6%                      | Feb 2016 - Mar 2016   |
| Chongqing            | 1,852                | 843   | 1,009  | 79.8%                      | Oct 2015 - Nov 2015   |
| Wuhan                | 2,163                | 1,018 | 1,145  | 98.3%                      | Oct 2015 - Dec 2015   |
| Xiamen               | 2,174                | 1,055 | 1,119  | 92.5%                      | Oct 2015 - Jan 2016   |
| Xi'an                | 2,049                | 962   | 1,087  | 89.4%                      | Nov 2015 - Feb 2016   |
| 2018 (N=10,233)      |                      |       |        |                            |                       |
| Chengdu              | 1,914                | 876   | 1,038  | 93.5%                      | Feb 2018 - April 2018 |
| Chongqing            | 1,829                | 837   | 992    | 90.8%                      | Sep 2017 - Nov 2017   |
| Wuhan                | 2,251                | 1,158 | 1,093  | 97.8%                      | Dec 2017 - Jan 2018   |
| Xiamen               | 2,116                | 1,121 | 995    | 89.7%                      | April 2018 - May 2018 |
| Xi'an                | 2,123                | 1,092 | 1,031  | 87.2%                      | June 2018 - July 2018 |

<sup>1</sup> Overall response rate is a product of household response rate and individual response rate

Supplemental Table 3. Demographic characteristics of adult urban residents in all five Chinese cities participated in the Tobacco Free Cities (TFC) initiative in 2015 and 2018

| Demographic Characteristics                       | 2015<br>(N=10,184) |       | 2018<br>(N=10,233) |       |
|---------------------------------------------------|--------------------|-------|--------------------|-------|
|                                                   | n                  | %     | n                  | %     |
| Sex                                               |                    |       |                    |       |
| Male                                              | 4781               | 51.58 | 4897               | 50.75 |
| Female                                            | 5403               | 48.42 | 5336               | 49.25 |
| Age (Years)                                       |                    |       |                    |       |
| 15-24                                             | 940                | 18.97 | 840                | 20.37 |
| 25-44                                             | 4222               | 40.84 | 4124               | 39.44 |
| 45-64                                             | 3354               | 29.73 | 3539               | 29.72 |
| 65 and above                                      | 1668               | 10.45 | 1730               | 10.47 |
| Education Level                                   |                    |       |                    |       |
| Primary school completed or below                 | 1626               | 10.86 | 1325               | 9.39  |
| Junior high school completed                      | 2317               | 22.12 | 2265               | 20.51 |
| Senior high school completed                      | 2825               | 30.08 | 2821               | 28.15 |
| College degree or above                           | 3304               | 36.95 | 3759               | 41.95 |
| Occupation                                        |                    |       |                    |       |
| Government employee, teacher, healthcare provider | 972                | 10.69 | 1080               | 11.47 |
| Factory, business, service industry employee      | 4358               | 45.63 | 3795               | 37.84 |
| Not in the labor force <sup>1</sup>               | 4773               | 43.68 | 5231               | 50.69 |
| Current smoking status                            |                    |       |                    |       |
| Yes                                               | 2275               | 22.75 | 2339               | 23.36 |
| No                                                | 7909               | 77.25 | 7885               | 76.64 |

<sup>1</sup> Respondents who were not in the labor force included students, homemakers, retired and unemployed residents either able or unable to work

Supplemental Table 4. Subgroup analysis by gender: adjusted ORs<sup>1</sup> for SHS exposure in indoor workplaces in all five Chinese cities participating the Tobacco Free Cities (TFC) initiative in 2015 and 2018

| Indicators                                        | Male |             | Female |             |
|---------------------------------------------------|------|-------------|--------|-------------|
|                                                   | OR   | 95% CI      | OR     | 95% CI      |
| <i>Year</i>                                       |      |             |        |             |
| 2015                                              | Ref. |             | Ref.   |             |
| 2018                                              | 0.72 | 0.56 - 0.91 | 0.70   | 0.55 - 0.90 |
| <i>Age Group</i>                                  |      |             |        |             |
| 15-24                                             | 1.52 | 0.59 - 3.90 | 1.92   | 0.44 - 8.44 |
| 25-34                                             | 1.40 | 0.57 - 3.44 | 1.73   | 0.41 - 7.40 |
| 35-64                                             | 1.70 | 0.71 - 4.08 | 1.83   | 0.42 - 7.96 |
| 65 and above                                      | Ref. |             | Ref.   |             |
| <i>Education</i>                                  |      |             |        |             |
| Primary school completed or below                 | Ref. |             | Ref.   |             |
| Junior high school completed                      | 0.80 | 0.46 - 1.38 | 0.62   | 0.40 - 0.95 |
| Senior high school completed                      | 0.85 | 0.50 - 1.44 | 0.51   | 0.34 - 0.77 |
| College degree or above                           | 0.70 | 0.41 - 1.18 | 0.40   | 0.26 - 0.63 |
| <i>Occupation</i>                                 |      |             |        |             |
| Government employee, teacher, healthcare provider | Ref. |             | Ref.   |             |
| Factory, business, service industry employee      | 1.79 | 1.45 - 2.21 | 1.33   | 1.03 - 1.71 |
| <i>Current smoking status</i>                     |      |             |        |             |
| Yes                                               | 2.23 | 1.84 - 2.71 | 2.14   | 1.18 - 3.87 |
| No                                                | Ref. |             | Ref.   |             |

<sup>1</sup> Controlling gender, age, education, occupation, and current smoking status

<sup>2</sup> Respondents who were not in the labor force included students, homemakers, retired and unemployed residents either able or unable to work

Supplemental Table 5. Subgroup analysis by gender: adjusted ORs<sup>1</sup> for SHS exposure in the home in all five Chinese cities participating the Tobacco Free Cities (TFC) initiative in 2015 and 2018

| Indicators                                        | Male |             | Female |             |
|---------------------------------------------------|------|-------------|--------|-------------|
|                                                   | OR   | 95% CI      | OR     | 95% CI      |
| <i>Year</i>                                       |      |             |        |             |
| 2015                                              | Ref. |             | Ref.   |             |
| 2018                                              | 0.57 | 0.46 - 0.71 | 0.68   | 0.55 - 0.84 |
| <i>Age Group</i>                                  |      |             |        |             |
| 15-24                                             | 1.15 | 0.83 - 1.59 | 1.16   | 0.85 - 1.56 |
| 25-34                                             | 1.21 | 0.93 - 1.57 | 1.44   | 1.11 - 1.86 |
| 35-64                                             | 1.33 | 1.01 - 1.75 | 1.39   | 1.09 - 1.76 |
| 65 and above                                      | Ref. |             | Ref.   |             |
| <i>Education</i>                                  |      |             |        |             |
| Primary school completed or below                 | Ref. |             | Ref.   |             |
| Junior high school completed                      | 1.06 | 0.75 - 1.51 | 0.99   | 0.77 - 1.27 |
| Senior high school completed                      | 1.01 | 0.72 - 1.41 | 0.87   | 0.68 - 1.13 |
| College degree or above                           | 0.97 | 0.69 - 1.36 | 0.88   | 0.67 - 1.16 |
| <i>Occupation</i>                                 |      |             |        |             |
| Government employee, teacher, healthcare provider | 0.95 | 0.73 - 1.23 | 1.07   | 0.84 - 1.36 |
| Factory, business, service industry employee      | 1.19 | 0.97 - 1.47 | 1.15   | 0.97 - 1.37 |
| Not in the labor force <sup>2</sup>               | Ref. |             | Ref.   |             |
| <i>Current smoking status</i>                     |      |             |        |             |
| Yes                                               | 1.84 | 1.54 - 2.19 | 2.64   | 1.76 - 3.96 |
| No                                                | Ref. |             | Ref.   |             |

<sup>1</sup> Controlling gender, age, education, occupation, and current smoking status

<sup>2</sup> Respondents who were not in the labor force included students, homemakers, retired and unemployed residents either able or unable to work

Supplemental Table 6. Subgroup analysis by gender: adjusted ORs<sup>1</sup> for SHS exposure in the restaurant in all five Chinese cities participating the Tobacco Free Cities (TFC) initiative in 2015 and 2018

| Indicators                                        | Male  |               | Female |              |
|---------------------------------------------------|-------|---------------|--------|--------------|
|                                                   | OR    | 95% CI        | OR     | 95% CI       |
| <i>Year</i>                                       |       |               |        |              |
| 2015                                              | Ref.  |               | Ref.   |              |
| 2018                                              | 0.82  | 0.63 - 1.05   | 0.72   | 0.59 - 0.88  |
| <i>Age Group</i>                                  |       |               |        |              |
| 15-24                                             | 2.89  | 2.13 - 3.93   | 1.44   | 1.09 - 1.91  |
| 25-34                                             | 1.00  | 0.76 - 1.30   | 1.35   | 1.08 - 1.68  |
| 35-64                                             | 0.91  | 0.73 - 1.14   | 1.43   | 1.20 - 1.71  |
| 65 and above                                      | Ref.  |               | Ref.   |              |
| <i>Education</i>                                  |       |               |        |              |
| Primary school completed or below                 | Ref.  |               | Ref.   |              |
| Junior high school completed                      | 0.68  | 0.53 - 0.87   | 0.91   | 0.75 - 1.11  |
| Senior high school completed                      | 0.68  | 0.54 - 0.85   | 0.85   | 0.69 - 1.05  |
| College degree or above                           | 0.49  | 0.37 - 0.64   | 0.56   | 0.45 - 0.70  |
| <i>Occupation</i>                                 |       |               |        |              |
| Government employee, teacher, healthcare provider | 0.87  | 0.64 - 1.18   | 1.23   | 0.99 - 1.52  |
| Factory, business, service industry employee      | 0.92  | 0.73 - 1.15   | 1.09   | 0.86 - 1.39  |
| Not in the labor force force ^                    | Ref.  |               | Ref.   |              |
| <i>Current smoking status</i>                     |       |               |        |              |
| Yes                                               | 13.53 | 11.12 - 15.46 | 9.87   | 6.55 - 14.89 |
| No                                                | Ref.  |               | Ref.   |              |

<sup>1</sup> Controlling gender, age, education, occupation, and current smoking status

<sup>2</sup> Respondents who were not in the labor force included students, homemakers, retired and unemployed residents either able or unable to work

Supplemental Table 7. Subgroup analysis by current smoking status: adjusted ORs<sup>1</sup> for SHS exposure in the workplace in all five Chinese cities participating the Tobacco Free Cities (TFC) initiative in 2015 and 2018

| Indicators                                        | Current smoker |             | Current non-smoker |             |
|---------------------------------------------------|----------------|-------------|--------------------|-------------|
|                                                   | OR             | 95% CI      | OR                 | 95% CI      |
| <i>Year</i>                                       |                |             |                    |             |
| 2015                                              | Ref.           |             | Ref.               |             |
| 2018                                              | 0.65           | 0.47 - 0.90 | 0.73               | 0.58 - 0.91 |
| <i>Gender</i>                                     |                |             |                    |             |
| Male                                              | 1.42           | 0.75 - 2.70 | 1.54               | 1.33 - 1.79 |
| Female                                            | Ref.           |             | Ref.               |             |
| <i>Age Group</i>                                  |                |             |                    |             |
| 15-24                                             | 0.96           | 0.28 - 3.29 | 2.09               | 0.70 - 6.30 |
| 25-34                                             | 1.16           | 0.36 - 3.76 | 1.82               | 0.62 - 5.35 |
| 35-64                                             | 1.84           | 0.59 - 5.72 | 1.80               | 0.62 - 5.23 |
| 65 and above                                      | Ref.           |             | Ref.               |             |
| <i>Education</i>                                  |                |             |                    |             |
| Primary school completed or below                 | Ref.           |             | Ref.               |             |
| Junior high school completed                      | 0.89           | 0.42 - 1.89 | 0.60               | 0.40 - 0.89 |
| Senior high school completed                      | 0.83           | 0.39 - 1.77 | 0.57               | 0.39 - 0.82 |
| College degree or above                           | 0.73           | 0.34 - 1.60 | 0.44               | 0.29 - 0.66 |
| <i>Occupation</i>                                 |                |             |                    |             |
| Government employee, teacher, healthcare provider | Ref.           |             | Ref.               |             |
| Factory, business, service industry employee      | 1.73           | 1.20 - 2.50 | 1.52               | 1.22 - 1.89 |

<sup>1</sup> Controlling gender, age, education, occupation, and current smoking status

Supplemental Table 8. Subgroup analysis by current smoking status: adjusted ORs<sup>1</sup> for SHS exposure in the home in all five Chinese cities participating the Tobacco Free Cities (TFC) initiative in 2015 and 2018

| Indicators                                        | Current smoker |             | Current non-smoker |             |
|---------------------------------------------------|----------------|-------------|--------------------|-------------|
|                                                   | OR             | 95% CI      | OR                 | 95% CI      |
| <i>Year</i>                                       |                |             |                    |             |
| 2015                                              | Ref.           |             | Ref.               |             |
| 2018                                              | 0.57           | 0.42 - 0.79 | 0.63               | 0.53 - 0.76 |
| <i>Gender</i>                                     |                |             |                    |             |
| Male                                              | 0.90           | 0.61 - 1.33 | 1.26               | 1.12 - 1.42 |
| Female                                            | Ref.           |             | Ref.               |             |
| <i>Age Group</i>                                  |                |             |                    |             |
| 15-24                                             | 1.47           | 0.84 - 2.59 | 1.10               | 0.86 - 1.41 |
| 25-34                                             | 1.33           | 0.84 - 2.10 | 1.32               | 1.08 - 1.62 |
| 35-64                                             | 1.81           | 1.17 - 2.80 | 1.25               | 1.02 - 1.54 |
| 65 and above                                      | Ref.           |             | Ref.               |             |
| <i>Education</i>                                  |                |             |                    |             |
| Primary school completed or below                 | Ref.           |             | Ref.               |             |
| Junior high school completed                      | 0.75           | 0.43 - 1.29 | 1.11               | 0.88 - 1.40 |
| Senior high school completed                      | 0.73           | 0.43 - 1.24 | 0.99               | 0.78 - 1.26 |
| College degree or above                           | 0.79           | 0.45 - 1.38 | 0.95               | 0.74 - 1.22 |
| <i>Occupation</i>                                 |                |             |                    |             |
| Government employee, teacher, healthcare provider | 0.66           | 0.45 - 0.99 | 1.10               | 0.89 - 1.36 |
| Factory, business, service industry employee      | 1.11           | 0.83 - 1.49 | 1.18               | 1.02 - 1.37 |
| Not in the labor force <sup>2</sup>               | Ref.           |             | Ref.               |             |

<sup>1</sup> Controlling gender, age, education, occupation, and current smoking status

<sup>2</sup> Respondents who were not in the labor force included students, homemakers, retired and unemployed residents either able or unable to work



Supplemental Table 9. Subgroup analysis by current smoking status: adjusted ORs<sup>1</sup> for SHS exposure in the restaurant in all five Chinese cities participating the Tobacco Free Cities (TFC) initiative in 2015 and 2018

| Indicators                                        | Current smoker |             | Current non-smoker |             |
|---------------------------------------------------|----------------|-------------|--------------------|-------------|
|                                                   | OR             | 95% CI      | OR                 | 95% CI      |
| <i>Year</i>                                       |                |             |                    |             |
| 2015                                              | Ref.           |             | Ref.               |             |
| 2018                                              | 0.86           | 0.65 - 1.13 | 0.74               | 0.60 - 0.90 |
| <i>Gender</i>                                     |                |             |                    |             |
| Male                                              | 0.73           | 0.48 - 1.10 | 0.58               | 0.50 - 0.67 |
| Female                                            | Ref.           |             | Ref.               |             |
| <i>Age Group</i>                                  |                |             |                    |             |
| 15-24                                             | 1.72           | 1.06 - 2.78 | 2.12               | 1.67 - 2.69 |
| 25-34                                             | 1.03           | 0.72 - 1.46 | 1.31               | 1.07 - 1.59 |
| 35-64                                             | 1.07           | 0.76 - 1.50 | 1.23               | 1.05 - 1.44 |
| 65 and above                                      | Ref.           |             | Ref.               |             |
| <i>Education</i>                                  |                |             |                    |             |
| Primary school completed or below                 | Ref.           |             | Ref.               |             |
| Junior high school completed                      | 0.57           | 0.41 - 0.81 | 0.87               | 0.72 - 1.05 |
| Senior high school completed                      | 0.56           | 0.40 - 0.78 | 0.82               | 0.67 - 0.99 |
| College degree or above                           | 0.37           | 0.25 - 0.55 | 0.55               | 0.45 - 0.69 |
| <i>Occupation</i>                                 |                |             |                    |             |
| Government employee, teacher, healthcare provider | 1.08           | 0.82 - 1.42 | 1.18               | 0.98 - 1.42 |
| Factory, business, service industry employee      | 1.13           | 0.82 - 1.57 | 1.19               | 0.99 - 1.48 |
| Not in the labor force <sup>2</sup>               | Ref.           |             | Ref.               |             |

<sup>1</sup> Controlling gender, age, education, occupation, and current smoking status

<sup>2</sup> Respondents who were not in the labor force included students, homemakers, retired and unemployed residents either able or unable to work

Supplemental Table 10. Adjusted ORs<sup>1</sup> for SHS exposure in the workplace by city and in all five Chinese cities participating the Tobacco Free Cities (TFC) initiative in 2015 and 2018

| Indicators                                        | Chengdu |             | Chongqing |              | Wuhan |             | Xiamen |             | Xi'an |              | Overall |             |
|---------------------------------------------------|---------|-------------|-----------|--------------|-------|-------------|--------|-------------|-------|--------------|---------|-------------|
|                                                   | OR      | 95% CI      | OR        | 95% CI       | OR    | 95% CI      | OR     | 95% CI      | OR    | 95% CI       | OR      | 95% CI      |
| <i>Year</i>                                       |         |             |           |              |       |             |        |             |       |              |         |             |
| 2015                                              | Ref.    |             | Ref.      |              | Ref.  |             | Ref.   |             | Ref.  |              | Ref.    |             |
| 2018                                              | 0.82    | 0.54 - 1.26 | 0.73      | 0.45 - 1.19  | 0.60  | 0.39 - 0.92 | 0.61   | 0.38 - 0.96 | 0.73  | 0.45 - 1.18  | 0.71    | 0.58 - 0.88 |
| <i>Gender</i>                                     |         |             |           |              |       |             |        |             |       |              |         |             |
| Male                                              | 1.64    | 1.26 - 2.14 | 1.53      | 1.09 - 2.16  | 1.36  | 0.98 - 1.88 | 1.64   | 1.19 - 2.26 | 1.61  | 1.17 - 2.22  | 1.53    | 1.32 - 1.76 |
| Female                                            | Ref.    |             | Ref.      |              | Ref.  |             | Ref.   |             | Ref.  |              | Ref.    |             |
| <i>Age Group</i>                                  |         |             |           |              |       |             |        |             |       |              |         |             |
| 15-24                                             | 1.42    | 0.27 - 7.51 | 3.37      | 0.73 - 15.49 | 0.63  | 0.15 - 2.72 | 1.05   | 0.30 - 3.66 | 2.69  | 0.42 - 17.09 | 1.77    | 0.79 - 3.98 |
| 25-34                                             | 0.98    | 0.19 - 5.13 | 3.03      | 0.68 - 13.58 | 0.92  | 0.20 - 4.14 | 1.21   | 0.39 - 3.77 | 2.27  | 0.36 - 14.14 | 1.62    | 0.73 - 3.60 |
| 35-64                                             | 1.23    | 0.23 - 6.57 | 2.47      | 0.54 - 11.24 | 1.06  | 0.27 - 4.13 | 1.79   | 0.63 - 5.14 | 2.69  | 0.45 - 16.20 | 1.85    | 0.84 - 4.07 |
| 65 and above                                      | Ref.    |             | Ref.      |              | Ref.  |             | Ref.   |             | Ref.  |              | Ref.    |             |
| <i>Education</i>                                  |         |             |           |              |       |             |        |             |       |              |         |             |
| Primary school completed                          | Ref.    |             | Ref.      |              | Ref.  |             | Ref.   |             | Ref.  |              | Ref.    |             |
| Junior high school completed                      | 0.33    | 0.13 - 0.81 | 0.66      | 0.31 - 1.43  | 0.89  | 0.33 - 2.38 | 0.64   | 0.43 - 0.95 | 2.11  | 0.70 - 6.35  | 0.65    | 0.45 - 0.95 |
| Senior high school completed                      | 0.19    | 0.08 - 0.43 | 0.58      | 0.26 - 1.29  | 0.94  | 0.31 - 2.81 | 0.90   | 0.59 - 1.37 | 1.46  | 0.53 - 4.03  | 0.62    | 0.44 - 0.89 |
| College degree or above                           | 0.17    | 0.07 - 0.41 | 0.47      | 0.20 - 1.10  | 0.73  | 0.25 - 2.11 | 0.58   | 0.34 - 1.01 | 1.17  | 0.43 - 3.15  | 0.50    | 0.34 - 0.74 |
| <i>Occupation</i>                                 |         |             |           |              |       |             |        |             |       |              |         |             |
| Government employee, teacher, healthcare provider | Ref.    |             | Ref.      |              | Ref.  |             | Ref.   |             | Ref.  |              | Ref.    |             |
| Factory, business, service industry employee      | 1.64    | 1.12 - 2.41 | 1.66      | 1.18 - 2.35  | 1.50  | 1.05 - 2.13 | 1.32   | 0.83 - 2.09 | 1.53  | 1.09 - 2.13  | 1.56    | 1.32 - 1.85 |
| <i>Current smoking status</i>                     |         |             |           |              |       |             |        |             |       |              |         |             |
| Yes                                               | 2.15    | 1.51 - 3.06 | 1.87      | 1.20 - 2.92  | 3.35  | 2.30 - 4.86 | 2.20   | 1.57 - 3.10 | 2.00  | 1.30 - 3.10  | 2.21    | 1.84 - 2.65 |
| No                                                | Ref.    |             | Ref.      |              | Ref.  |             | Ref.   |             | Ref.  |              | Ref.    |             |

<sup>1</sup>Controlling gender, age, education, occupation, and current smoking status

Supplemental Table 11. Adjusted ORs<sup>1</sup> for SHS exposure in the home by city and in all five Chinese cities participating the Tobacco Free Cities (TFC) initiative in 2015 and 2018

| Indicators                                        | Chengdu |               | Chongqing |              | Wuhan |             | Xiamen |              | Xi'an |              | Overall |              |
|---------------------------------------------------|---------|---------------|-----------|--------------|-------|-------------|--------|--------------|-------|--------------|---------|--------------|
|                                                   | OR      | 95% CI        | OR        | 95% CI       | OR    | 95% CI      | OR     | 95% CI       | OR    | 95% CI       | OR      | 95% CI       |
| <i>Year</i>                                       |         |               |           |              |       |             |        |              |       |              |         |              |
| 2015                                              | Ref.    |               | Ref.      |              | Ref.  |             | Ref.   |              | Ref.  |              | Ref.    |              |
| 2018                                              | 0.80    | 0.54 - 1.20   | 0.65      | 0.45 - 0.95  | 0.86  | 0.54 - 1.40 | 0.73   | 0.42 - 1.28  | 0.78  | 0.54 - 1.13  | 0.76    | 0.63 - 0.93  |
| <i>Gender</i>                                     |         |               |           |              |       |             |        |              |       |              |         |              |
| Male                                              | 0.50    | 0.38 - 0.66   | 0.61      | 0.45 - 0.81  | 0.54  | 0.33 - 0.90 | 0.62   | 0.47 - 0.81  | 0.67  | 0.53 - 0.83  | 0.59    | 0.51 - 0.68  |
| Female                                            | Ref.    |               | Ref.      |              | Ref.  |             | Ref.   |              | Ref.  |              | Ref.    |              |
| <i>Age Group</i>                                  |         |               |           |              |       |             |        |              |       |              |         |              |
| 15-24                                             | 1.71    | 1.09 - 2.68   | 1.15      | 0.76 - 1.76  | 1.91  | 1.15 - 3.17 | 3.03   | 2.02 - 4.56  | 3.27  | 2.13 - 5.02  | 2.06    | 1.67 - 2.55  |
| 25-34                                             | 1.20    | 0.83 - 1.73   | 1.00      | 0.73 - 1.36  | 1.00  | 0.65 - 1.53 | 2.11   | 1.43 - 3.11  | 1.37  | 0.90 - 2.08  | 1.25    | 1.04 - 1.50  |
| 35-64                                             | 1.20    | 0.90 - 1.59   | 1.10      | 0.81 - 1.49  | 0.94  | 0.71 - 1.23 | 1.50   | 1.10 - 2.05  | 1.46  | 1.07 - 1.99  | 1.21    | 1.05 - 1.40  |
| 65 and above                                      | Ref.    |               | Ref.      |              | Ref.  |             | Ref.   |              | Ref.  |              | Ref.    |              |
| <i>Education</i>                                  |         |               |           |              |       |             |        |              |       |              |         |              |
| Primary school completed                          | Ref.    |               | Ref.      |              | Ref.  |             | Ref.   |              | Ref.  |              | Ref.    |              |
| Junior high school completed                      | 0.85    | 0.59 - 1.23   | 1.00      | 0.75 - 1.34  | 1.27  | 0.86 - 1.85 | 0.37   | 0.28 - 0.50  | 0.80  | 0.55 - 1.19  | 0.82    | 0.69 - 0.96  |
| Senior high school completed                      | 0.72    | 0.50 - 1.04   | 1.05      | 0.80 - 1.38  | 1.18  | 0.84 - 1.64 | 0.35   | 0.24 - 0.52  | 0.74  | 0.49 - 1.13  | 0.77    | 0.65 - 0.91  |
| College degree or above                           | 0.55    | 0.38 - 0.79   | 0.77      | 0.55 - 1.08  | 0.62  | 0.41 - 0.94 | 0.21   | 0.13 - 0.33  | 0.51  | 0.33 - 0.80  | 0.52    | 0.43 - 0.63  |
| <i>Occupation</i>                                 |         |               |           |              |       |             |        |              |       |              |         |              |
| Government employee, teacher, healthcare provider | 0.94    | 0.58 - 1.52   | 0.94      | 0.62 - 1.42  | 0.82  | 0.55 - 1.23 | 0.94   | 0.63 - 1.41  | 0.70  | 0.47 - 1.05  | 0.86    | 0.71 - 1.04  |
| Factory, business, service industry employee      | 0.98    | 0.73 - 1.31   | 1.01      | 0.79 - 1.30  | 1.12  | 0.81 - 1.55 | 0.83   | 0.61 - 1.12  | 0.96  | 0.70 - 1.31  | 0.98    | 0.86 - 1.13  |
| Not in the labor force <sup>2</sup>               | Ref.    |               | Ref.      |              | Ref.  |             | Ref.   |              | Ref.  |              | Ref.    |              |
| <i>Current smoking status</i>                     |         |               |           |              |       |             |        |              |       |              |         |              |
| Yes                                               | 17.36   | 12.69 - 23.77 | 10.34     | 7.55 - 14.15 | 11.28 | 7.1 - 17.92 | 8.68   | 6.19 - 12.18 | 10.83 | 8.06 - 14.57 | 11.27   | 9.62 - 13.20 |
| No                                                | Ref.    |               | Ref.      |              | Ref.  |             | Ref.   |              | Ref.  |              | Ref.    |              |

<sup>1</sup> Controlling gender, age, education, occupation, and current smoking status<sup>2</sup> Respondents who were not in the labor force included students, homemakers, retired and unemployed residents either able or unable to work

Supplemental Table 12. Adjusted ORs<sup>1</sup> for SHS exposure in the restaurant by city and in all five Chinese cities participating the Tobacco Free Cities (TFC) initiative in 2015 and 2018

| Indicators                                        | Chengdu |             | Chongqing |             | Wuhan |             | Xiamen |             | Xi'an |             | Overall |             |
|---------------------------------------------------|---------|-------------|-----------|-------------|-------|-------------|--------|-------------|-------|-------------|---------|-------------|
|                                                   | OR      | 95% CI      | OR        | 95% CI      | OR    | 95% CI      | OR     | 95% CI      | OR    | 95% CI      | OR      | 95% CI      |
| <i>Year</i>                                       |         |             |           |             |       |             |        |             |       |             |         |             |
| 2015                                              | Ref.    |             | Ref.      |             | Ref.  |             | Ref.   |             | Ref.  |             | Ref.    |             |
| 2018                                              | 0.65    | 0.42 - 0.98 | 0.55      | 0.37 - 0.80 | 0.76  | 0.51 - 1.15 | 0.62   | 0.45 - 0.86 | 0.60  | 0.40 - 0.88 | 0.63    | 0.52 - 0.75 |
| <i>Gender</i>                                     |         |             |           |             |       |             |        |             |       |             |         |             |
| Male                                              | 1.09    | 0.87 - 1.36 | 1.21      | 0.96 - 1.53 | 1.14  | 0.91 - 1.41 | 1.83   | 1.28 - 2.62 | 1.31  | 1.03 - 1.68 | 1.24    | 1.11 - 1.38 |
| Female                                            | Ref.    |             | Ref.      |             | Ref.  |             | Ref.   |             | Ref.  |             | Ref.    |             |
| <i>Age Group</i>                                  |         |             |           |             |       |             |        |             |       |             |         |             |
| 15-24                                             | 1.33    | 0.78 - 2.27 | 1.10      | 0.69 - 1.75 | 1.18  | 0.77 - 1.81 | 1.96   | 1.20 - 3.21 | 1.42  | 0.92 - 2.22 | 1.15    | 0.91 - 1.45 |
| 25-34                                             | 1.04    | 0.68 - 1.60 | 1.69      | 1.14 - 2.50 | 1.37  | 0.97 - 1.94 | 2.11   | 1.26 - 3.53 | 1.51  | 1.08 - 2.11 | 1.31    | 1.08 - 1.59 |
| 35-64                                             | 1.18    | 0.78 - 1.78 | 1.54      | 0.98 - 2.42 | 1.51  | 1.06 - 2.14 | 1.56   | 0.97 - 2.49 | 1.33  | 0.91 - 1.94 | 1.35    | 1.10 - 1.65 |
| 65 and above                                      | Ref.    |             | Ref.      |             | Ref.  |             | Ref.   |             | Ref.  |             | Ref.    |             |
| <i>Education</i>                                  |         |             |           |             |       |             |        |             |       |             |         |             |
| Primary school completed                          | Ref.    |             | Ref.      |             | Ref.  |             | Ref.   |             | Ref.  |             | Ref.    |             |
| Junior high school completed                      | 1.05    | 0.68 - 1.64 | 0.83      | 0.55 - 1.26 | 1.18  | 0.65 - 2.18 | 1.06   | 0.74 - 1.52 | 1.50  | 0.87 - 2.58 | 1.02    | 0.82 - 1.26 |
| Senior high school completed                      | 1.01    | 0.61 - 1.65 | 0.74      | 0.49 - 1.14 | 1.37  | 0.78 - 2.40 | 0.97   | 0.60 - 1.57 | 1.06  | 0.61 - 1.83 | 0.93    | 0.75 - 1.16 |
| College degree or above                           | 0.90    | 0.56 - 1.46 | 0.90      | 0.59 - 1.37 | 1.25  | 0.70 - 2.25 | 1.00   | 0.64 - 1.56 | 0.96  | 0.57 - 1.63 | 0.91    | 0.73 - 1.14 |
| <i>Occupation</i>                                 |         |             |           |             |       |             |        |             |       |             |         |             |
| Government employee, teacher, healthcare provider | 0.87    | 0.57 - 1.32 | 0.73      | 0.48 - 1.11 | 1.07  | 0.71 - 1.62 | 1.36   | 0.87 - 2.14 | 1.36  | 0.95 - 1.95 | 1.01    | 0.83 - 1.23 |
| Factory, business, service industry employee      | 1.12    | 0.87 - 1.43 | 1.01      | 0.71 - 1.42 | 1.01  | 0.75 - 1.35 | 1.53   | 1.13 - 2.07 | 1.50  | 1.07 - 2.12 | 1.17    | 1.02 - 1.35 |
| Not in the labor force <sup>2</sup>               | Ref.    |             | Ref.      |             | Ref.  |             | Ref.   |             | Ref.  |             | Ref.    |             |
| <i>Current smoking status</i>                     |         |             |           |             |       |             |        |             |       |             |         |             |
| Yes                                               | 1.82    | 1.35 - 2.46 | 1.93      | 1.35 - 2.75 | 2.27  | 1.71 - 3.03 | 1.84   | 1.20 - 2.83 | 1.68  | 1.1 - 2.56  | 1.88    | 1.59 - 2.21 |
| No                                                | Ref.    |             | Ref.      |             | Ref.  |             | Ref.   |             | Ref.  |             | Ref.    |             |

<sup>1</sup> Controlling gender, age, education, occupation, and current smoking status<sup>2</sup> Respondents who were not in the labor force included students, homemakers, retired and unemployed residents either able or unable to work
